# Supplementary material for: Effects of Dietary Calcium Lactate Supplementation on Laying Performance, Blood Index, Shinbone Quality, Jejunal Immunity, and Egg Quality of Aged Laying Hens
Source: MDPI journal article supplement (doi:10.3390/agriculture14020256), 2024-02-05
Supplement: s1 [file s1]

**Table S1.** The calcium sources of each treatment group.

|                            | Ctrl  | Calcium lactate, % |       |       |
|----------------------------|-------|--------------------|-------|-------|
|                            |       | 0.25               | 0.5   | 1.0   |
| Calcium level              | 3.50  | 3.50               | 3.50  | 3.50  |
| Ingredients                |       |                    |       |       |
| Calcium lactate            | 0     | 0.25               | 0.50  | 1.0   |
| Limestone                  | 9.15  | 9.04               | 8.92  | 8.69  |
| Calcium hydrogen phosphate | 0.95  | 0.95               | 0.95  | 0.95  |
| Zeolite powder             | 1.15  | 1.01               | 0.88  | 0.61  |
| In total                   | 11.25 | 11.25              | 11.25 | 11.25 |

**Table S2.** The information of commercial kits used for chemical analysis.

| Index (Full name)               | Index (abbreviation) | Product code |
|---------------------------------|----------------------|--------------|
| Total protein                   | TP                   | A095-1-1     |
| Albumin                         | ALB                  | A028-1-1     |
| Globulin                        | GLB                  | H128-1-1     |
| Total cholesterol               | TC                   | A111-1-1     |
| High density lipoprotein        | HDL                  | F003-1-1     |
| Low density lipoprotein         | LDL                  | H249-1-1     |
| Creatinine                      | CR                   | C011-2-1     |
| Urea                            | BUN                  | C013-1-1     |
| Aspartate aminotransferase      | AST                  | C010-2-1     |
| Alanine aminotransferase        | ALT                  | C009-2-1     |
| Total bilirubin                 | TBil                 | C019-1-1     |
| Creatine kinase                 | CK                   | A032-1-1     |
| Calcium                         | Ca                   | C004-2-1     |
| Phosphorus                      | P                    | T018-1-1     |
| Immunoglobulin A                | IgA                  | H108         |
| Immunoglobulin M                | IgM                  | H109         |
| Immunoglobulin G                | IgG                  | H106         |
| Interleukin-2                   | IL-2                 | H003-1-1     |
| Interleukin-6                   | IL-6                 | H007-1-1     |
| Tumor necrosis factor- $\alpha$ | TNF- $\alpha$        | H052-1-2     |
| Secretory immunoglobulin A      | sIgA                 | H108-2-1     |
